# Supplementary material
Source: HighWire-hosted journal article supplement (https://jech.bmj.com/content/73/9/846)

## Ozone by socioeconomic deprivation (CT) interaction on ED visit risk

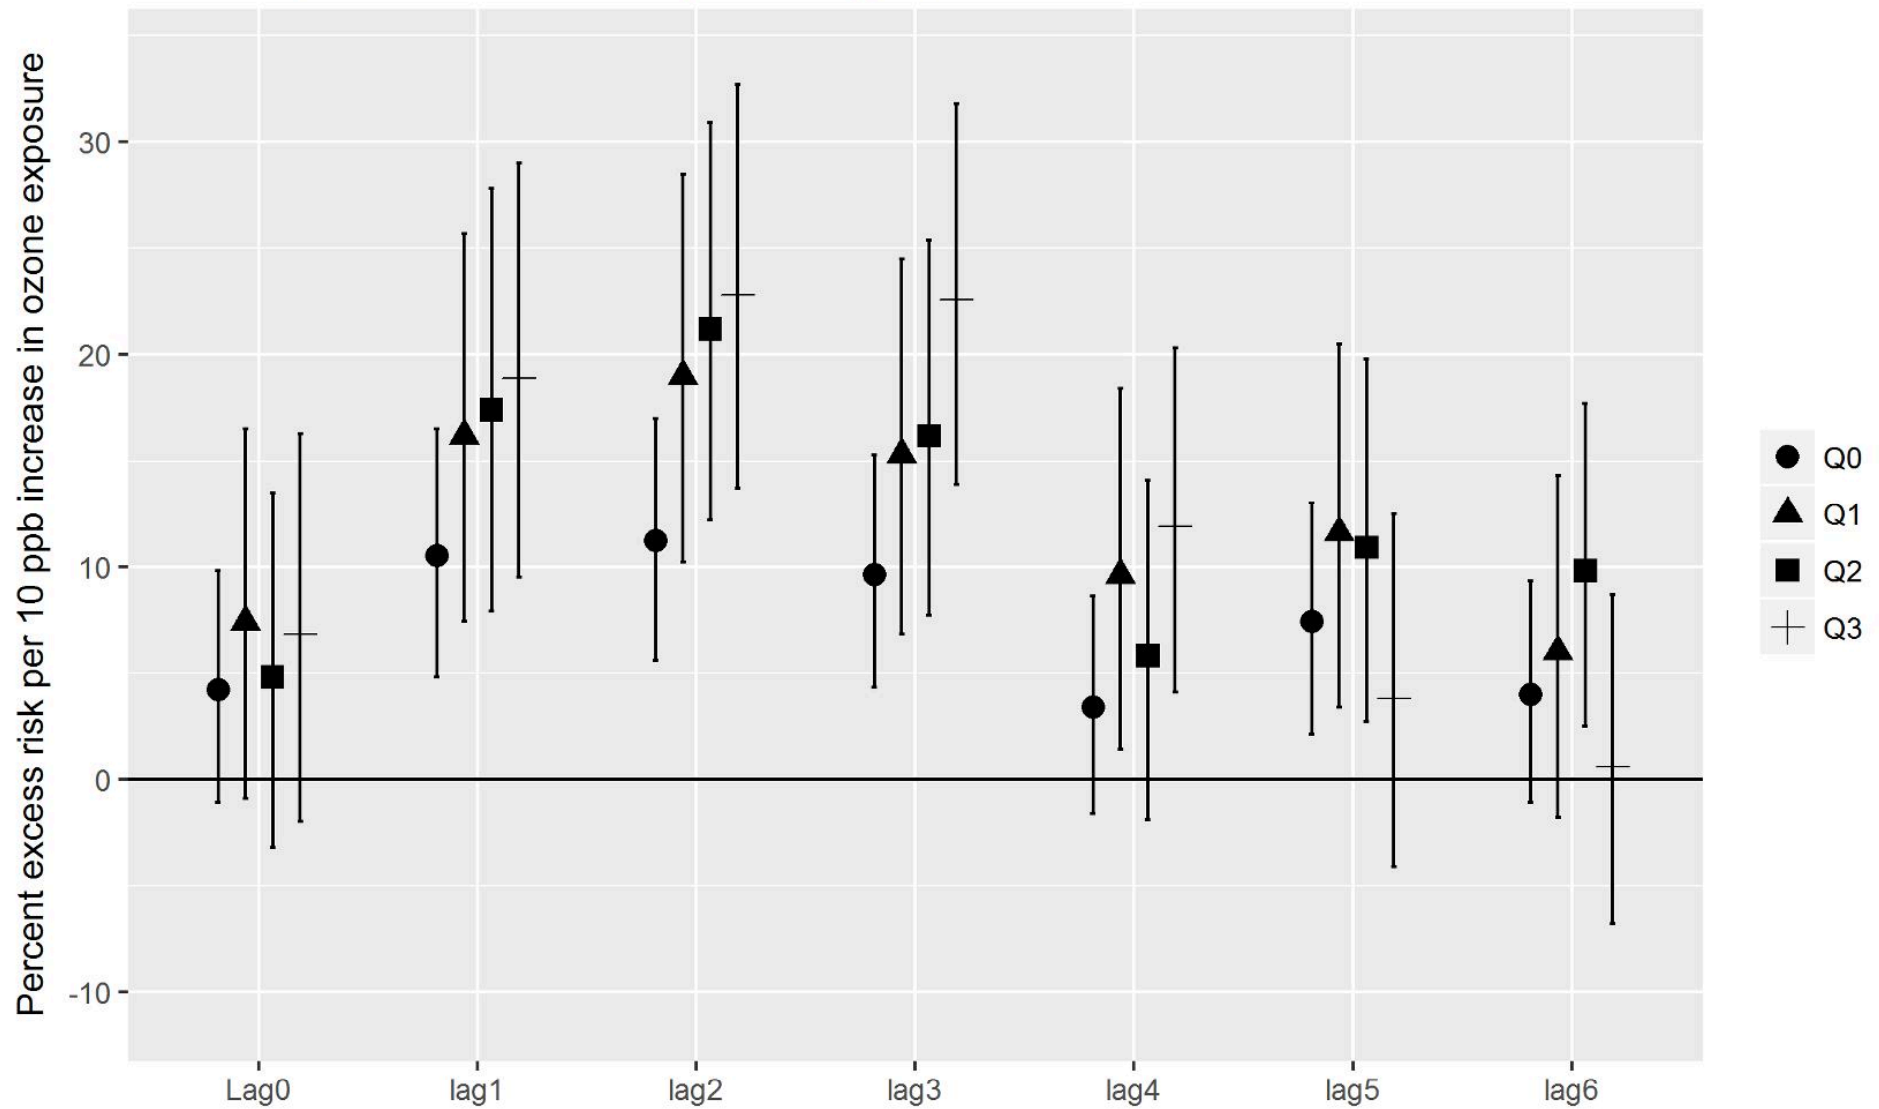

Supplement: inline-supplementary-material-2 [file inline-supplementary-material-2.pdf]
